# Supplementary material
Source: Springer Nature journal article supplement (https://www.springermedizin.de/resource/supplementary/13017_2014_366_MOESM1_ESM.pdf/9636040)

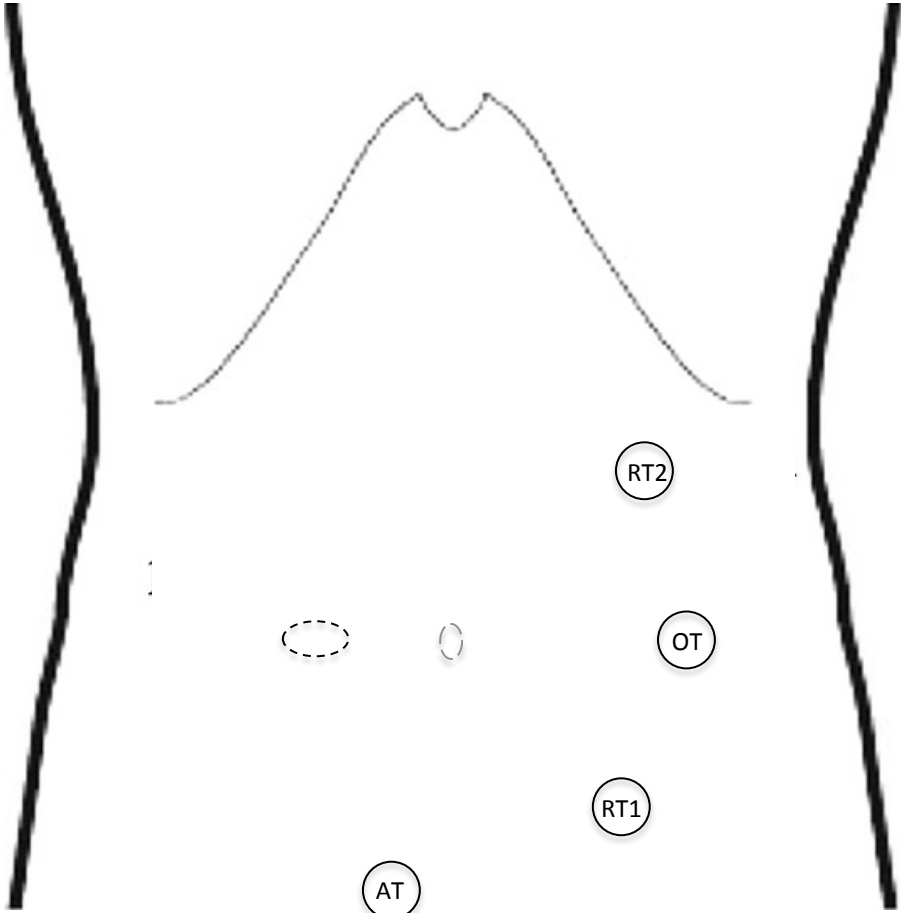

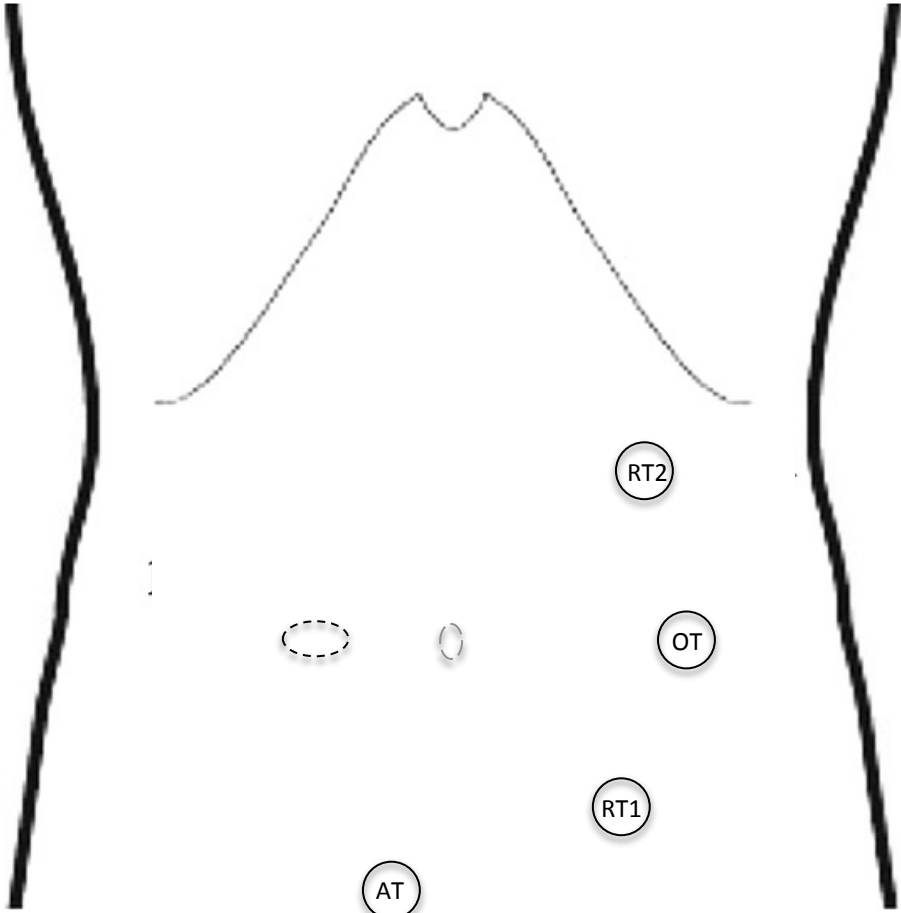

Supplement: MOESM1 [file 9636040]
